# Supplementary figures and images for: Thermal source Fourier transform infrared microtomography applied to Arctic sea ice diatoms
Source: Royal Society of Chemistry journal article supplement (doi:10.1039/c6an02056a), 2017-01-01

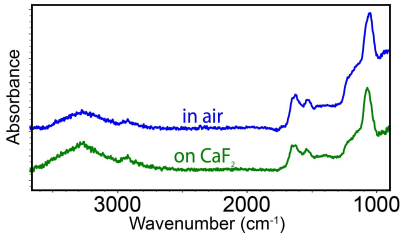

Supplement: c6an02056a2.pdf [file c6an02056a2.pdf]
